# Supplementary material for: Theoretical studies on CO2 capture behavior of quaternary ammonium-based polymeric ionic liquids
Source: Royal Society of Chemistry journal article supplement (doi:10.1039/c5cp07229h), 2016-01-01
Supplement: c5cp07229h1.pdf [file c5cp07229h1.pdf]

## **Electronic Supporting Information**

# Theoretical Studies on CO<sub>2</sub> Capture Behavior of the Quaternary Ammonium-Based Polymeric Ionic Liquids

Tao Wang\*<sup>1</sup>, Kun Ge<sup>1</sup>, Kexian Chen<sup>2,3</sup>, Chenglong Hou<sup>1</sup>, Mengxiang Fang<sup>1</sup>

<sup>1</sup>State Key Laboratory of Clean Energy Utilization, Zhejiang University, Hangzhou, 310027, P. R. China

<sup>2</sup>College of Chemical and Biological Engineering, Zhejiang University, Hangzhou 310027, P. R. China

<sup>3</sup>College of Food and Biology Engineering, Zhejiang Gongshang University, Hangzhou, 310018, P. R. China

E-mail: oatgnaw@zju.edu.cn

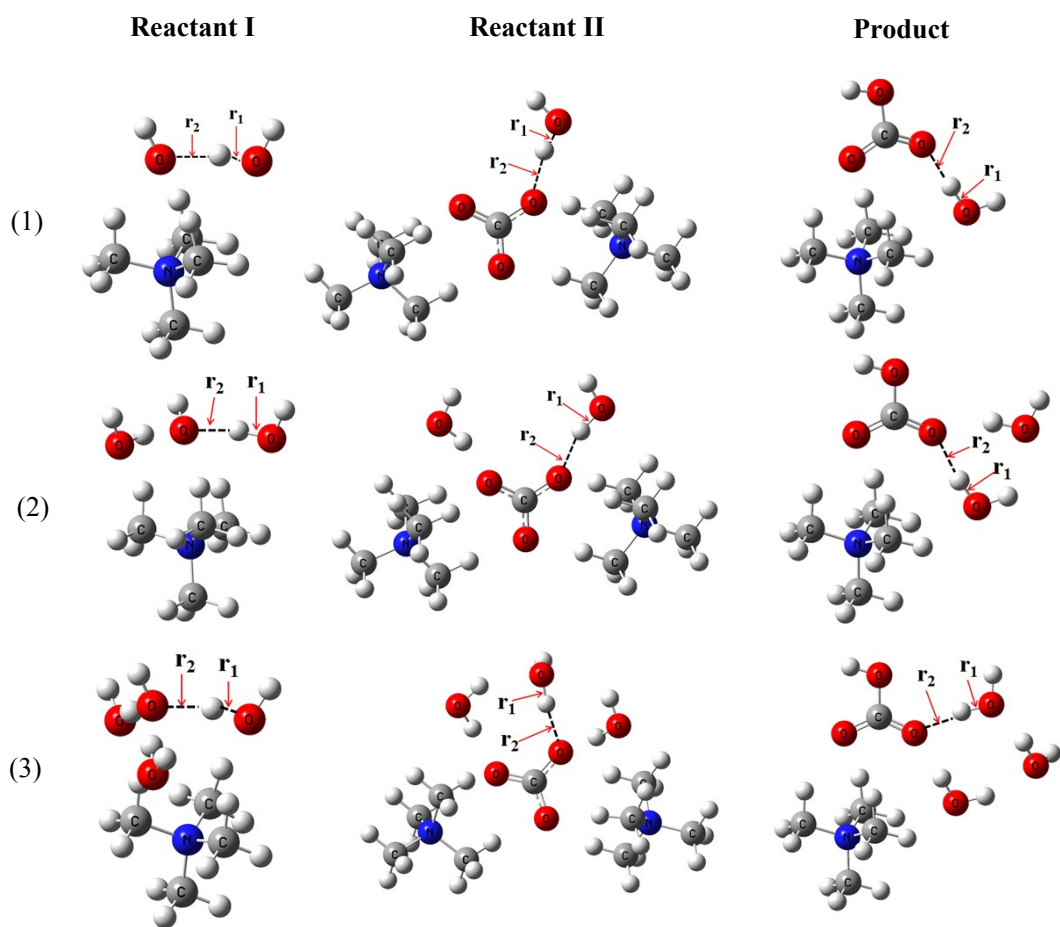

**Fig. S1** Optimized structures of model compounds of PILs with different anions and one (1), two (2) or three (3)

hydrated water molecules.  $r_1$  is the O-H bond length in the most active hydrated water  $r_2$  is the length of H-bond.

The optimized structure is calculated at B3LYP/6-311++G\*\* level. PILs with certain number of water molecules could have different conformers (see Figure S2) and Figure S1 shows the most stable ones in our calculations.

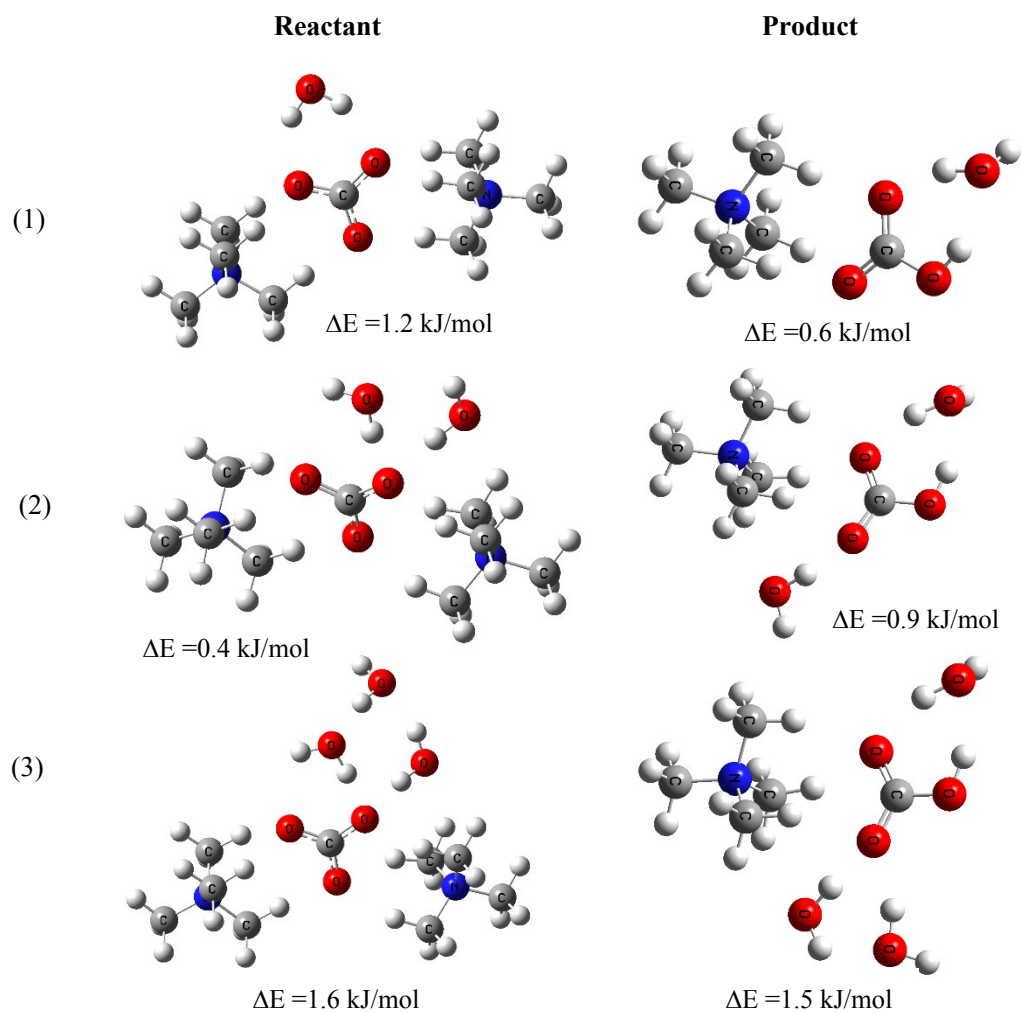

**Fig. S2** Optimized structures of conformers other than the most stable ones shown in Figure S1.  $\Delta E$  is the relative energy compared with the most stable one.

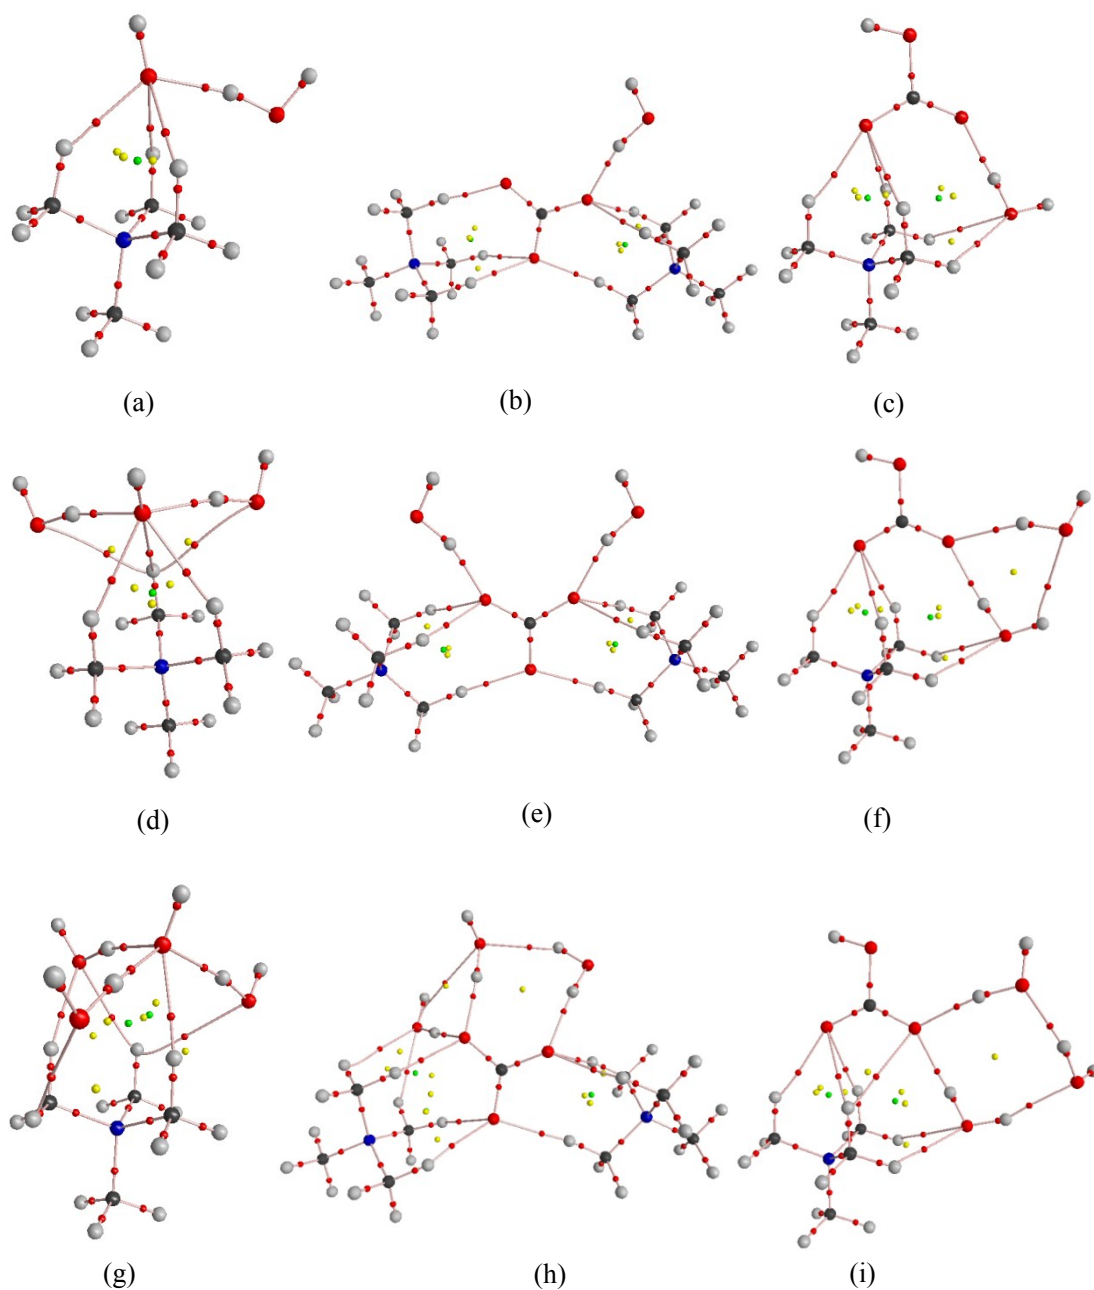

**Fig. S3** Atoms in molecules (AIM) analysis for optimized structures of model compounds with (a) hydroxide anion and one hydrated water molecule, (b) carbonate anion and one hydrated water molecule, (c) bicarbonate anion and one hydrated water molecule, (d) hydroxide anion and two hydrated water molecules, (e) carbonate anion and two hydrated water molecules, (f) bicarbonate anion and two hydrated water molecules, (g) hydroxide anion and three hydrated water molecules, (h) carbonate anion and three hydrated water molecules, (i) bicarbonate anion and three hydrated water molecules

Relevant binary critical points (BCPs), ring critical points (RCPs) and cage critical points (CCPs) are displayed.

Small red dots BCPs, small yellow dots RCPs, small green dots CCPs, black spheres carbon atoms, gray spheres

hydrogen atoms, blue spheres nitrogen atoms, red spheres oxygen atoms, pink lines bond paths.

**Table S1** Electron Density ( $\rho$ ) and Laplacian of the Electron Density ( $\nabla^2\rho$ ) in the BCPs of H-bonds displayed in Fig. S2. The electron density associated with all critical points ( $\rho$ ) involved in the interaction is correlated to its strength. On the other hand, the Laplacian of the density ( $\nabla^2\rho$ ) indicates regions with concentration of local charge and presents a negative sign when a bond occurs, and a positive one defining a weak interaction.

|                |                                          | hydroxide |                                           | carbonate                                              |                | bicarbonate                               |                                                          |        |        |
|----------------|------------------------------------------|-----------|-------------------------------------------|--------------------------------------------------------|----------------|-------------------------------------------|----------------------------------------------------------|--------|--------|
|                |                                          | $\rho$    | $\nabla^2\rho$                            | $\rho$                                                 | $\nabla^2\rho$ | $\rho$                                    | $\nabla^2\rho$                                           |        |        |
| 1 <sup>+</sup> | OH-H <sub>2</sub> O<br>(1*)              | 0.0613    | 0.1422                                    | CO <sub>3</sub> <sup>-</sup> -H <sub>2</sub> O<br>(1*) | 0.0505         | 0.1496                                    | HCO <sub>3</sub> <sup>2-</sup> -H <sub>2</sub> O<br>(1*) | 0.0427 | 0.1407 |
|                |                                          | 0.0248    | 0.0896                                    |                                                        | 0.0243         | 0.0798                                    | HCO <sub>3</sub> <sup>2-</sup> -CH <sub>3</sub><br>(3*)  | 0.0179 | 0.0564 |
|                | OH-CH <sub>3</sub><br>(3*)               | 0.0245    | 0.0885                                    | CO <sub>3</sub> <sup>-</sup> -CH <sub>3</sub><br>(6*)  | 0.0296         | 0.0999                                    | H <sub>2</sub> O-CH <sub>3</sub><br>(2*)                 | 0.0161 | 0.0600 |
|                |                                          | 0.0257    | 0.0818                                    |                                                        | 0.0339         | 0.1036                                    |                                                          | 0.0132 | 0.0459 |
| 2 <sup>+</sup> | OH-H <sub>2</sub> O<br>(2*)              | 0.0566    | 0.1430                                    | CO <sub>3</sub> <sup>-</sup> -H <sub>2</sub> O<br>(2*) | 0.0454         | 0.1492                                    | HCO <sub>3</sub> <sup>2-</sup> -H <sub>2</sub> O<br>(2*) | 0.0308 | 0.1162 |
|                |                                          | 0.0568    | 0.1434                                    |                                                        | 0.0462         | 0.1497                                    |                                                          | 0.0337 | 0.1226 |
|                | OH-CH <sub>3</sub><br>(3*)               | 0.0137    | 0.0524                                    |                                                        | 0.0262         | 0.0887                                    | HCO <sub>3</sub> <sup>2-</sup> -CH <sub>3</sub><br>(3*)  | 0.0146 | 0.0449 |
|                |                                          | 0.0138    | 0.0531                                    |                                                        | 0.0263         | 0.0891                                    |                                                          | 0.0163 | 0.0506 |
|                |                                          | 0.0209    | 0.0652                                    | CO <sub>3</sub> <sup>-</sup> -CH <sub>3</sub><br>(6*)  | 0.0273         | 0.0933                                    | H <sub>2</sub> O-CH <sub>3</sub><br>(2*)                 | 0.0154 | 0.0559 |
|                | H <sub>2</sub> O-CH <sub>3</sub><br>(2*) | 0.0078    | 0.0294                                    |                                                        | 0.0276         | 0.0949                                    |                                                          | 0.0128 | 0.0474 |
| 3 <sup>+</sup> |                                          | 0.0078    | 0.0298                                    |                                                        | 0.0291         | 0.0905                                    | H <sub>2</sub> O-CH <sub>3</sub><br>(2*)                 | 0.0133 | 0.0442 |
|                | OH-H <sub>2</sub> O<br>(3*)              | 0.0481    | 0.1312                                    | CO <sub>3</sub> <sup>-</sup> -H <sub>2</sub> O<br>(3*) | 0.0290         | 0.0901                                    | H <sub>2</sub> O-H <sub>2</sub> O<br>(1*)                | 0.0112 | 0.0388 |
|                |                                          | 0.0496    | 0.1325                                    |                                                        | 0.0386         | 0.1257                                    | HCO <sub>3</sub> <sup>2-</sup> -H <sub>2</sub> O<br>(2*) | 0.0418 | 0.1347 |
|                |                                          | 0.0628    | 0.1518                                    |                                                        | 0.0475         | 0.1365                                    |                                                          | 0.0279 | 0.1059 |
|                | OH-CH <sub>3</sub><br>(1*)               | 0.0190    | 0.0690                                    |                                                        | 0.0405         | 0.1320                                    |                                                          | 0.0090 | 0.0304 |
|                |                                          | 0.0190    | 0.0690                                    |                                                        | 0.0278         | 0.1007                                    |                                                          | 0.0168 | 0.0529 |
|                |                                          | 0.0069    | 0.0221                                    | CO <sub>3</sub> <sup>-</sup> -CH <sub>3</sub><br>(6*)  | 0.0215         | 0.0718                                    | HCO <sub>3</sub> <sup>-</sup> -CH <sub>3</sub><br>(4*)   | 0.0129 | 0.0396 |
|                |                                          | 0.0069    | 0.0221                                    |                                                        | 0.0258         | 0.0845                                    |                                                          | 0.0143 | 0.0508 |
|                | H <sub>2</sub> O-CH <sub>3</sub><br>(4*) | 0.0088    | 0.0298                                    |                                                        | 0.0224         | 0.0703                                    |                                                          | 0.0143 | 0.0508 |
|                |                                          | 0.0108    | 0.0375                                    | H <sub>2</sub> O-CH <sub>3</sub><br>(2*)               | 0.0237         | 0.0805                                    | H <sub>2</sub> O-CH <sub>3</sub><br>(2*)                 | 0.0149 | 0.0541 |
|                | 0.0178                                   | 0.0609    | H <sub>2</sub> O-CH <sub>3</sub><br>(2*)  | 0.0073                                                 | 0.0247         | H <sub>2</sub> O-CH <sub>3</sub><br>(2*)  | 0.0141                                                   | 0.0476 |        |
|                |                                          |           | H <sub>2</sub> O-H <sub>2</sub> O<br>(2*) | 0.0113                                                 | 0.0415         | H <sub>2</sub> O-H <sub>2</sub> O<br>(2*) | 0.0342                                                   | 0.1195 |        |
|                |                                          |           |                                           | 0.0182                                                 | 0.0590         |                                           | 0.0266                                                   | 0.0925 |        |
|                |                                          |           |                                           | 0.0054                                                 | 0.0209         |                                           |                                                          |        |        |

<sup>+</sup> The number of hydrated water in hydrated ionic pairs

<sup>\*</sup> The number of H-bond of the displayed types

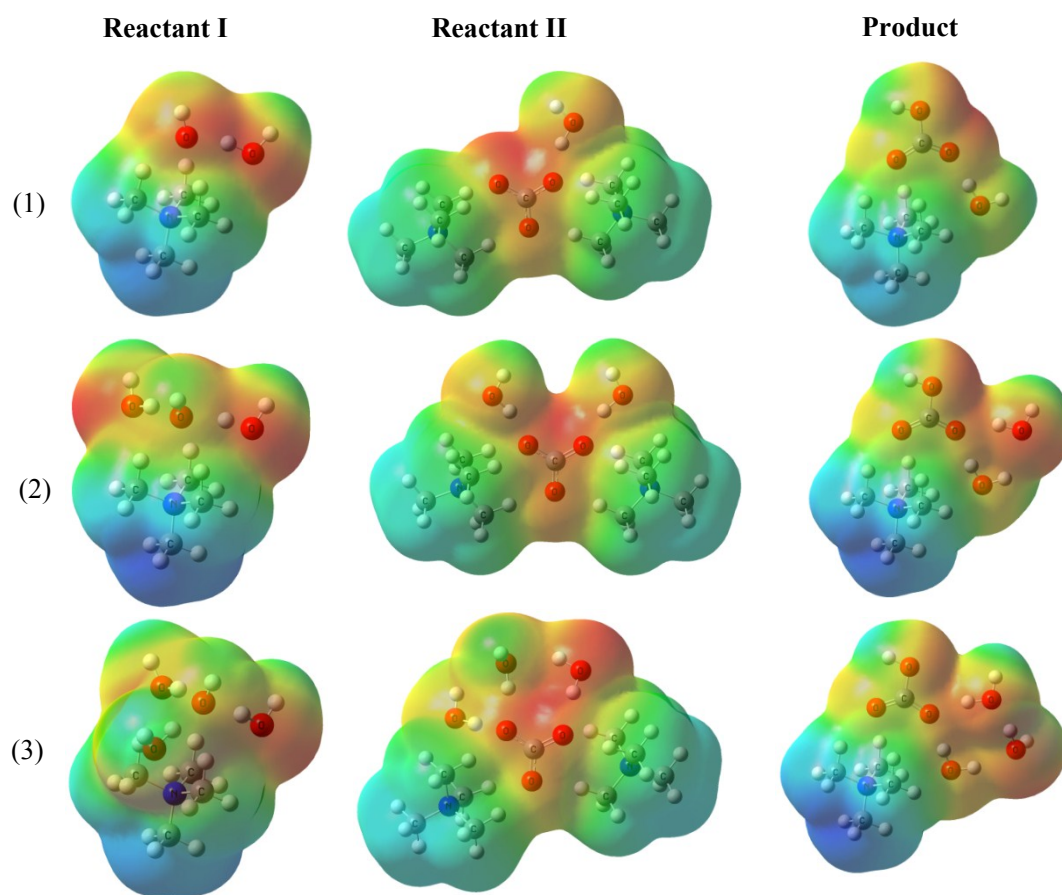

**Fig. S4** Electrostatic potential maps of model compounds of PILs with different anions and one (1), two (2) or three (3) hydrated water molecules.

The electrostatic potential surfaces were calculated through populational analysis at B3LYP/6-311++G\*\* level.

Electron density projected onto electrostatic potential isosurface (mapped at 0.01 a.u.). The red zones represent negative charge center and the blue zones represent positive charge center.

The AIM analysis of model compounds of PILs with different anions and different number of hydrated water molecules is shown in Figure S3 and the values of  $\rho$  and  $\nabla^2\rho$  of BCPs are shown in Table S1. The AIM analysis confirms the strong H-bonds between water and anions. The H-bonds between water molecules are remarkable for model compounds of PILs with bicarbonate anion, because water molecules have self-association distribution. However, these H-bonds are ignorable for model compounds of PILs with hydroxide or carbonate anion, which is the result of mutual independence distribution of water molecules. The variation of the maximum strength of H-bonds between water and model compounds has a similar tendency with that of atomic charge of oxygen-atom in hydrated water and O-H bond length and H-bond length, which indicates that there is a direct relation between the maximum strength of H-bonds and their charge parameters or structure parameters [1].

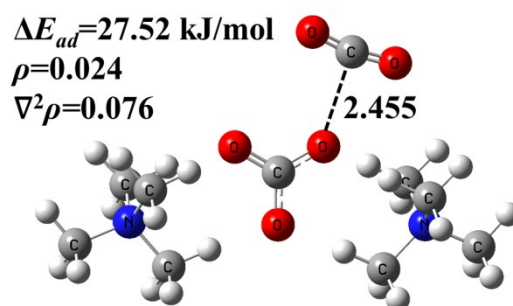

Fig. S5 Direct interaction of CO<sub>2</sub> and model compounds of P[VBTEA][CO<sub>3</sub><sup>2-</sup>].

## Literature Cited

- [1] M. Shahabi, H. Raissi, F. Mollania, *Struct Chem* **2015**, 26, 491–506.
